# Supplementary material for: Acupuncture for Behavioral and Psychological Symptoms of Dementia: A Systematic Review and Meta-Analysis
Source: MDPI journal article supplement (doi:10.3390/jcm10143087), 2021-07-13
Supplement: s1 [file s1]

**Supplement 2.** Search terms used in each database**MEDLINE via PubMed**

|    | Searches                                                                                                                                                                                                                                        | Results    |
|----|-------------------------------------------------------------------------------------------------------------------------------------------------------------------------------------------------------------------------------------------------|------------|
| #1 | Dementia[MeSH] OR dement*[Title/Abstract] OR Alzheimer*[Title/Abstract] OR “Lewy body”[Title/Abstract] OR Huntington*[Title/Abstract] OR Parkinson*[Title/Abstract] OR “Pick disease”[Title/Abstract] OR “cognitive impairment”[Title/Abstract] | 399,150    |
| #2 | Acupuncture[MeSH] OR “Acupuncture Therapy”[MeSH] OR “Acupuncture Points”[MeSH] OR acupunct*[Title/Abstract] OR Electroacupuncture[MeSH] OR electroacupunct*[Title/Abstract] OR electro-acupunct*[Title/Abstract] OR acupoint[Title/Abstract]    | 32,330     |
| #3 | #1 AND #2                                                                                                                                                                                                                                       | <b>800</b> |

**EMBASE via Elsevier**

|    | Searches                                                                                                                                                                                                                                                  | Results      |
|----|-----------------------------------------------------------------------------------------------------------------------------------------------------------------------------------------------------------------------------------------------------------|--------------|
| #1 | 'dementia'/exp OR 'dement*':ab,ti OR 'Alzheimer disease'/exp OR 'Alzheimer*':ab,ti OR 'Lewy body'/exp OR 'Lewy body':ab,ti OR 'Huntington*':ab,ti OR 'Parkinson disease'/exp OR 'Parkinson':ab,ti OR 'Pick disease':ab,ti OR 'cognitive impairment':ab,ti | 633,149      |
| #2 | 'acupuncture'/exp OR 'acupunct*':ab,ti OR 'acupuncture point'/exp OR 'electroacupuncture'/exp OR 'electroacupunct*':ab,ti OR 'electro-acupunct*':ab,ti OR 'acupoint*':ab,ti                                                                               | 51,549       |
| #3 | #1 AND #2                                                                                                                                                                                                                                                 | <b>1,237</b> |

**CENTRAL**

|    | Searches                                                                                                                 | Results    |
|----|--------------------------------------------------------------------------------------------------------------------------|------------|
| #1 | MeSH descriptor: [Dementia] explode all trees                                                                            | 5,964      |
| #2 | (dement* OR Alzheimer* OR “Lewy body” OR Huntington* OR Parkinson* OR “Pick disease” OR “cognitive impairment”):ti,ab,kw | 34,558     |
| #3 | MeSH descriptor: [Acupuncture] explode all trees                                                                         | 151        |
| #4 | MeSH descriptor: [Acupuncture Therapy] explode all trees                                                                 | 4,749      |
| #5 | MeSH descriptor: [Acupuncture Points] explode all trees                                                                  | 2,002      |
| #6 | MeSH descriptor: [Electroacupuncture] explode all trees                                                                  | 803        |
| #7 | (acupunct* OR electroacupunct* OR electro-acupunct* OR acupoint):ti,ab,kw                                                | 16,846     |
| #8 | ((#1 OR #2) AND (#3 OR #4 OR #5 OR #6 OR #7)) in Trials                                                                  | <b>353</b> |

**AMED via EBSCO**

|    | Searches                                                                                                                                                                             | Results    |
|----|--------------------------------------------------------------------------------------------------------------------------------------------------------------------------------------|------------|
| #1 | Dementia[SU] OR dement*[TX] OR Alzheimer*[TX] OR “Lewy body”[TX] OR Huntington*[TX] OR Parkinson*[TX] OR “Pick disease”[TX] OR “cognitive impairment”[TX]                            | 6,788      |
| #2 | Acupuncture[SU] OR “Acupuncture Therapy”[SU] OR “Acupuncture Points”[SU] OR acupunct*[TX] OR Electroacupuncture[SU] OR electroacupunct*[TX] OR electro-acupunct*[TX] OR acupoint[TX] | 11,781     |
| #3 | #1 AND #2                                                                                                                                                                            | <b>129</b> |

### CINAHL via EBSCO

|    | Searches                                                                                                                                                                             | Results      |
|----|--------------------------------------------------------------------------------------------------------------------------------------------------------------------------------------|--------------|
| #1 | Dementia[MH] OR dement*[TX] OR Alzheimer*[TX] OR “Lewy body”[TX] OR Huntington*[TX] OR Parkinson*[TX] OR “Pick disease”[TX] OR “cognitive impairment”[TX]                            | 220,660      |
| #2 | Acupuncture[MH] OR “Acupuncture Therapy”[MH] OR “Acupuncture Points”[MH] OR acupunct*[TX] OR Electroacupuncture[MH] OR electroacupunct*[TX] OR electro-acupunct*[TX] OR acupoint[TX] | 33,133       |
| #3 | #1 AND #2                                                                                                                                                                            | <b>5,227</b> |

### PsycARTICLES via ProQuest

|    | Searches                                                                                                                                                                 | Results    |
|----|--------------------------------------------------------------------------------------------------------------------------------------------------------------------------|------------|
| #1 | SU(Dementia) OR ‘dement*’ OR ‘Alzheimer*’ OR ‘Lewy body’ OR ‘Huntington*’ OR ‘Parkinson*’ OR ‘Pick disease’ OR ‘cognitive impairment’                                    | 28,534     |
| #2 | SU(Acupuncture) OR SU(Acupuncture Therapy) OR SU(Acupuncture Points) OR ‘acupunct*’ OR SU(Electroacupuncture) OR ‘electroacupunct*’ OR ‘electro-acupunct*’ OR ‘acupoint’ | 350        |
| #3 | #1 AND #2                                                                                                                                                                | <b>117</b> |

### OASIS

|    | Searches | Results  |
|----|----------|----------|
| #1 | 치매 AND 침 | <b>4</b> |

### KISS

|    | Searches | Results   |
|----|----------|-----------|
| #1 | 치매 AND 침 | <b>12</b> |

**RISS**

|    | Searches | Results |
|----|----------|---------|
| #1 | 치매 AND 침 | 2       |

**KMbase**

|    | Searches | Results |
|----|----------|---------|
| #1 | 치매 AND 침 | 5       |

**KCI**

|    | Searches | Results |
|----|----------|---------|
| #1 | 치매 AND 침 | 3       |

**CNKI**

|    | Searches                                                                                                                                                                  | Results |
|----|---------------------------------------------------------------------------------------------------------------------------------------------------------------------------|---------|
| #1 | (SU='痴呆'+ '阿尔茨海默病'+ 'dementia'+ 'Alzheimer') AND (SU='精神行为'+ '幻觉'+ '妄想'+ '攻击行为'+ '焦虑'+ '忧虑'+ '烦乱'+ '流浪'+ '抑郁'+ '失眠'+ '睡眠'+ '不寐'+ 'BPSD') AND (SU='针'+ '鍼'+ 'acupuncture') | 77      |

**Wanfang data**

|    | Searches                                                                                                                                                                                                               | Results |
|----|------------------------------------------------------------------------------------------------------------------------------------------------------------------------------------------------------------------------|---------|
| #1 | (主题:痴呆 or 主题:阿尔茨海默病 or 主题:dementia or 主题:Alzheimer) AND (主题:精神行为 or 主题:幻觉 or 主题:妄想 or 主题:攻击行为 or 主题:焦虑 or 主题:忧虑 or 主题:烦乱 or 主题:流浪 or 主题:抑郁 or 主题:失眠 or 主题:睡眠 or 主题:不寐 or 主题:BPSD) AND (主题:针 or 主题:鍼 or 主题:acupuncture) | 749     |
