# Supplementary material for: Acupuncture for Behavioral and Psychological Symptoms of Dementia: A Systematic Review and Meta-Analysis
Source: MDPI journal article supplement (doi:10.3390/jcm10143087), 2021-07-13
Supplement: s1 [file s1]

#### Supplement 4. Methodological quality of the included before-after studies

|               | 1. Was the study question or objective clearly stated? | 2. Were eligibility/selection criteria for the study population prespecified and clearly described? | 3. Were the participants in the study representative of those who would be eligible for the test/service/intervention in the general or clinical population of interest? | 4. Were all eligible participants that met the prespecified entry criteria enrolled? | 5. Was the sample size sufficiently large to provide confidence in the findings? | 6. Was the test/service/intervention clearly described and delivered consistently across the study population? | 7. Were the outcome measures prespecified, clearly defined, valid, reliable, and assessed consistently across all study participants? | 8. Were the people assessing the outcomes blinded to the participants' exposures/interventions? | 9. Was the loss to follow-up after baseline 20% or less? Were those lost to follow-up accounted for in the analysis? | 10. Did the statistical methods examine changes in outcome measures from before to after the intervention? Were statistical tests done that provided p values for the pre-to-post changes? | 11. Were outcome measures of interest taken multiple times before the intervention and multiple times after the intervention (i.e., did they use an interrupted time-series design)? | 12. If the intervention was conducted at a group level (e.g., a whole hospital, a community, etc.) did the statistical analysis take into account the use of individual-level data to determine effects at the group level? |
|---------------|--------------------------------------------------------|-----------------------------------------------------------------------------------------------------|--------------------------------------------------------------------------------------------------------------------------------------------------------------------------|--------------------------------------------------------------------------------------|----------------------------------------------------------------------------------|----------------------------------------------------------------------------------------------------------------|---------------------------------------------------------------------------------------------------------------------------------------|-------------------------------------------------------------------------------------------------|----------------------------------------------------------------------------------------------------------------------|--------------------------------------------------------------------------------------------------------------------------------------------------------------------------------------------|--------------------------------------------------------------------------------------------------------------------------------------------------------------------------------------|-----------------------------------------------------------------------------------------------------------------------------------------------------------------------------------------------------------------------------|
| Lombardo 2001 | Yes                                                    | Yes                                                                                                 | No                                                                                                                                                                       | Cannot determine                                                                     | No                                                                               | No                                                                                                             | Yes                                                                                                                                   | Not reported                                                                                    | Yes                                                                                                                  | Yes                                                                                                                                                                                        | Yes                                                                                                                                                                                  | No                                                                                                                                                                                                                          |
| Ying 2006     | Yes                                                    | Yes                                                                                                 | No                                                                                                                                                                       | Cannot determine                                                                     | No                                                                               | Yes                                                                                                            | Yes                                                                                                                                   | Not reported                                                                                    | Yes                                                                                                                  | Yes                                                                                                                                                                                        | Yes                                                                                                                                                                                  | No                                                                                                                                                                                                                          |
